# Supplementary material
Source: Springer Nature journal article supplement (https://www.springermedizin.de/resource/supplementary/13046_2013_682_MOESM1_ESM.pdf/9662702)
Supplement: MOESM1 [file 9662702]

**Supporting data:****Table s1.** The analysis of FOXP3 SNPs genotypes in all donors

| Genotype  | HCC n(%)  | CHB n(%)  | HEAL n(%) | HCC-HEAL        |                  | CHB-HEAL        |                  | HCC-CHB         |         |
|-----------|-----------|-----------|-----------|-----------------|------------------|-----------------|------------------|-----------------|---------|
|           | n=392     | n=344     | n=372     | OR(95%CI)       | P value          | OR(95%CI)       | P value          | OR(95%CI)       | P value |
| rs2280883 |           |           |           |                 |                  |                 |                  |                 |         |
| CC        | 54(13.8)  | 55(16.0)  | 41(11.0)  | 1.29(0.84-1.99) | 0.249            | 1.54(0.99-2.37) | 0.051            | 0.84(0.56-1.26) | 0.339   |
| TT+CT     | 338(86.2) | 289(84.0) | 331(89.0) | 0.78(0.50-1.20) |                  | 0.65(0.42-1.01) |                  | 1.19(0.79-1.79) |         |
| TT        | 312(79.6) | 255(74.1) | 267(71.8) | 1.55(1.11-2.17) | <b>0.01</b>      | 1.13(0.81-1.57) | 0.479            | 1.38(0.98-1.95) | 0.068   |
| CC+CT     | 79(20.2)  | 89(25.9)  | 105(28.2) | 0.64(0.46-0.90) |                  | 0.89(0.64-1.24) |                  | 0.73(0.51-1.03) |         |
| CT        | 26(6.6)   | 34(9.9)   | 64(17.2)  | 0.34(0.21-0.55) | <b>&lt;0.001</b> | 0.53(0.34-0.82) | <b>0.004</b>     | 0.65(0.38-1.10) | 0.108   |
| CC+TT     | 366(93.4) | 310(90.1) | 308(82.8) | 2.93(1.81-4.73) |                  | 1.90(1.21-2.96) |                  | 1.54(0.91-2.63) |         |
| rs3761549 |           |           |           |                 |                  |                 |                  |                 |         |
| CC        | 301(77.6) | 256(74.6) | 233(64.4) | 1.92(1.39-2.64) | <b>&lt;0.001</b> | 1.63(1.18-2.25) | <b>0.003</b>     | 1.18(0.84-1.65) | 0.351   |
| TT+CT     | 87(22.4)  | 87(25.4)  | 129(35.6) | 0.52(0.38-0.72) |                  | 0.61(0.44-0.85) |                  | 0.85(0.61-1.20) |         |
| TT        | 59(15.2)  | 50(14.6)  | 41(11.3)  | 1.40(0.92-2.15) | 0.118            | 1.34(0.86-2.08) | 0.198            | 1.05(0.70-1.58) | 0.812   |
| CC+CT     | 329(84.8) | 293(85.4) | 321(88.7) | 0.71(0.47-1.09) |                  | 0.75(0.48-1.17) |                  | 0.95(0.63-1.43) |         |
| CT        | 28(7.2)   | 37(10.8)  | 88(24.3)  | 0.24(0.15-0.38) | <b>&lt;0.001</b> | 0.38(0.25-0.57) | <b>&lt;0.001</b> | 0.64(0.39-1.08) | 0.091   |
| CC+TT     | 360(92.8) | 306(89.2) | 274(75.7) | 4.13(2.62-6.50) |                  | 2.66(1.75-4.03) |                  | 1.56(0.93-2.60) |         |

“HEAL”: Healthy donors.
